# Supplementary material
Source: publisher site journal article supplement (https://www.spandidos-publications.com/4081/downloadSupplementary)
Supplement: Supplementary file 1 [file downloadSupplementary]

Table SI. Prediction of closely interacting partners with IL-6 and their functional description related to inflammation.

| Protein | Functional description                                                                                                                                                                                                                                                         |
|---------|--------------------------------------------------------------------------------------------------------------------------------------------------------------------------------------------------------------------------------------------------------------------------------|
| STAT3   | Signal transducer and transcription activator 3. It mediates the cellular responses to interleukin-6 and promotes various acute-phase protein genes. It acts as a regulator of inflammatory response by regulating T-helper cells.                                             |
| JAK2    | Tyrosine-protein kinase JAK2. It mediates essential signaling events in both innate and adaptive immunity. It plays a pivotal role in signal transduction via its association with type II receptors IFN- $\alpha$ , IFN- $\beta$ and IFN- $\gamma$ and multiple interleukins. |
